# Supplementary material for: Variation in NAT2 acetylation phenotypes is associated with differences in food-producing subsistence modes and ecoregions in Africa
Source: PubMed Central journal article supplement (PMC4665893; doi:10.1186/s12862-015-0543-6), 2015-12-01

### Geographic location

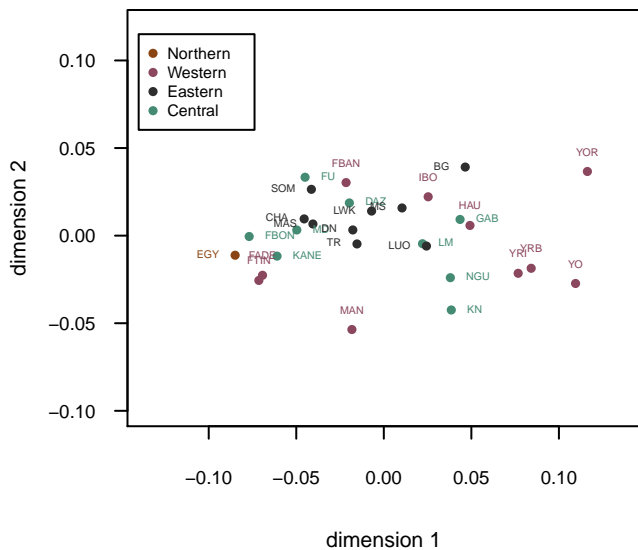

### Linguistic affiliation

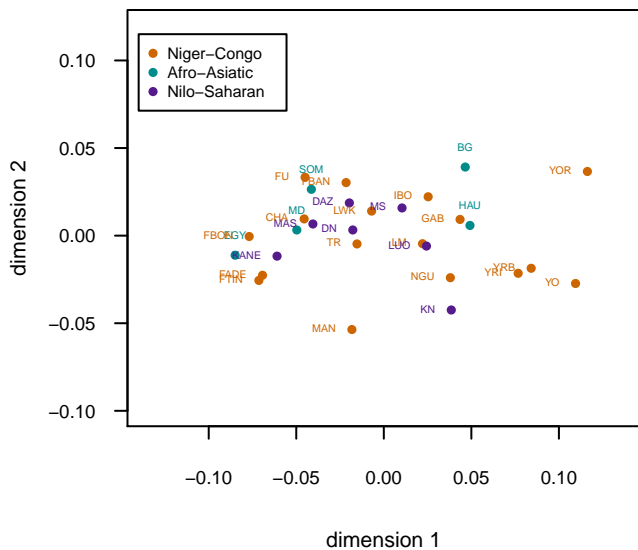

### Subsistence mode

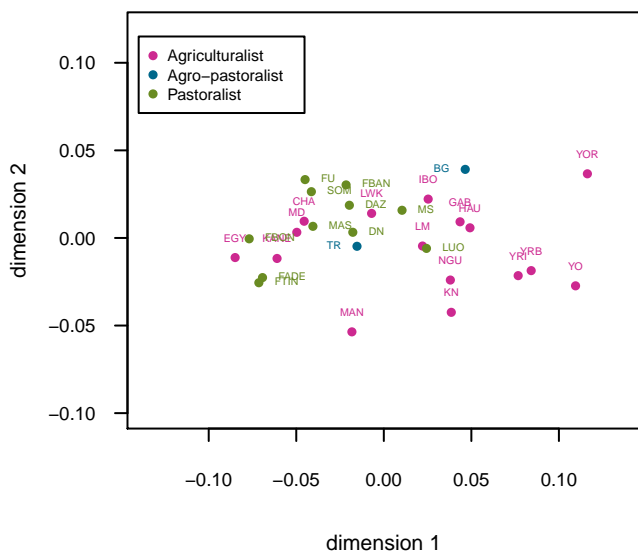

### Biome

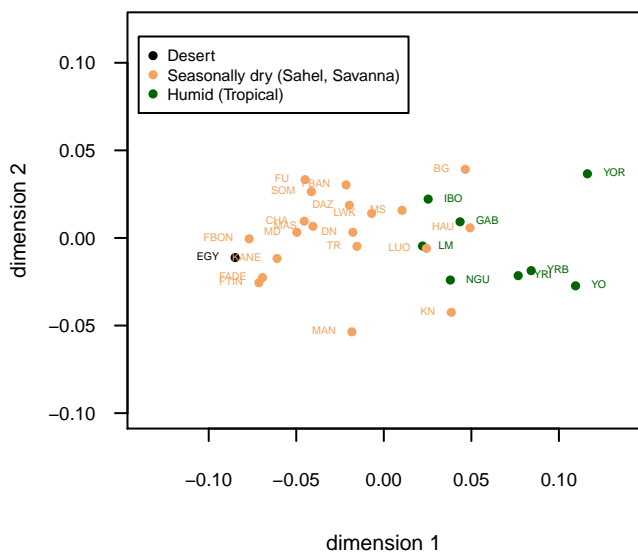

Supplement: 12862_2015_543_MOESM11_ESM.pdf [file 12862_2015_543_MOESM11_ESM.pdf]
